# Supplementary material
Source: publisher figshare collection journal article supplement (https://future-science-group.figshare.com/ndownloader/files/34159650)
Supplement: Supplementary file 1 [file 34159650]

Supplementary Figure 1. Quality assessment of the included studies

|  | Sievers et al (2001) | Larson et al (2002) | | Dowell et al (2001) | | | Taksin et al (2007) | | Kobayashi et al (2009) |
| --- | --- | --- | --- | --- | --- | --- | --- | --- | --- |
| Confounding bias |  | |  | |  |  | |  | |
| Selection bias |  | |  | |  |  | |  | |
| Classification bias |  | |  | |  |  | |  | |
| Deviations from intended interventions |  | |  | |  |  | |  | |
| Missing data |  | |  | |  |  | |  | |
| Outcome measurement bias |  | |  | |  |  | |  | |
| Reporting of results bias |  | |  | |  |  | |  | |

|  | Low risk of bias |
| --- | --- |
|  | Moderate risk of bias |
|  | High risk of bias |
|  | Unclear/NA |
